# Supplementary material for: A simple and visible colorimetric method through Zr4+–phosphate coordination for the assay of protein tyrosine phosphatase 1B and screening of its inhibitors
Source: Royal Society of Chemistry journal article supplement (doi:10.1039/c5an00970g), 2015-01-01
Supplement: c5an00970g1.pdf [file c5an00970g1.pdf]

## Supporting Information

### A simple and visible colorimetric method through $Zr^{4+}$ -phosphate coordination for the assay of protein tyrosine phosphatase 1B and its inhibitor screening

Juan Zhang,<sup>a</sup> Jun Lv,<sup>a</sup> Xiaonan Wang,<sup>a</sup> Defeng Li,<sup>a</sup> Zhaoxia Wang<sup>\*b</sup> and Genxi Li<sup>\*a,c</sup>

<sup>a</sup>Laboratory of Biosensing Technology, School of Life Sciences, Shanghai University, Shanghai 200444, PR China. E-mail: genxili@nju.edu.cn; Fax: +86-21-66137541

<sup>b</sup>Department of Oncology, The Second Affiliated Hospital of Nanjing Medical University, Nanjing 210011, PR China. E-mail: zhaoxiawang88@hotmail.com; Fax: +86-25-58509810

<sup>c</sup>State Key Laboratory of Pharmaceutical Biotechnology, Department of Biochemistry, Nanjing University, Nanjing 210093, PR China. E-mail: genxili@nju.edu.cn; Fax: +86-25-83592510

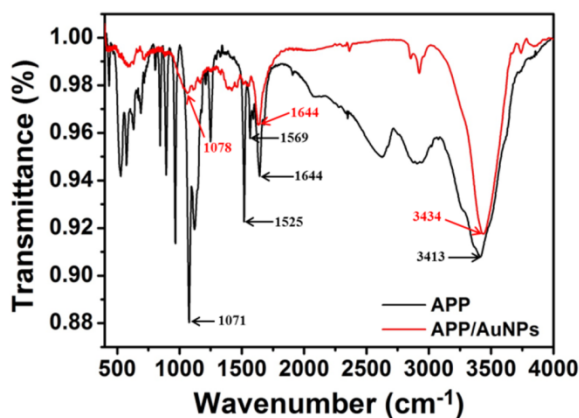

Figure S1. FT-IR spectra of APP and APP/AuNPs.

---

\* Corresponding authors, Fax: +86-25-58509810 (Z. Wang), +86 25 83592510 (G. Li); E-mail addresses: zhaoxiawang88@hotmail.com (Z. Wang), genxili@nju.edu.cn (G. Li).
